# Supplementary material
Source: MDPI journal article supplement (https://www.mdpi.com/2311-5629/2/3/21)
Supplement: s1 [file s1]

# Supplementary Materials: Article Synergetic Hybrid Aerogels of Vanadia and Graphene as Electrode Materials of Supercapacitors

Xuwei Fu, Yuming Chen, Yu Zhu and Sadhan C. Jana

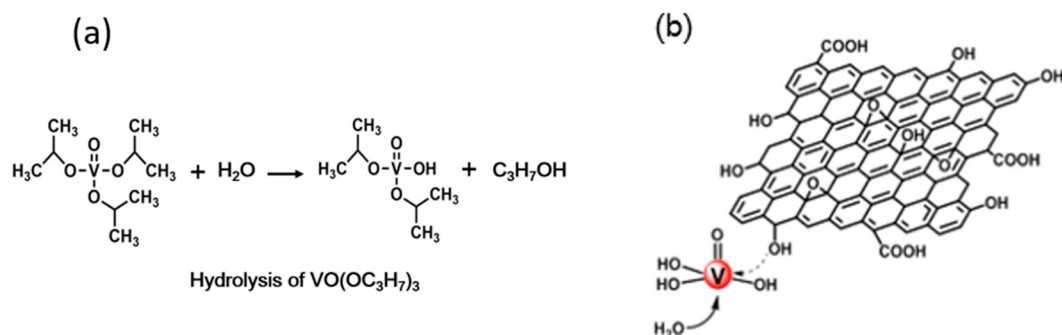

**Figure S1.** (a) Hydrolysis of vanadium tri-isopropoxide; and (b) complexation of vanadium hydroxide with graphene oxide.

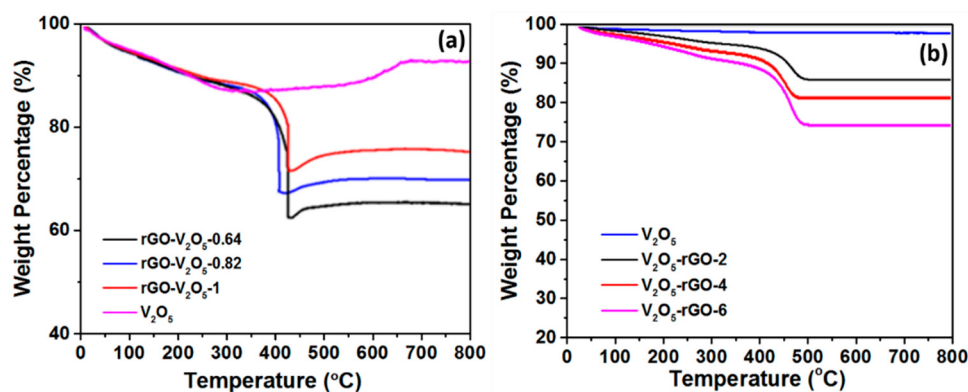

**Figure S2.** TGA curves conducted in an air atmosphere of (a)  $\text{V}_2\text{O}_5$  aerogel and a series of  $\text{rGO-V}_2\text{O}_5$  composite aerogels prepared by Method I and (b) thermal-treated  $\text{V}_2\text{O}_5$  aerogel and  $\text{V}_2\text{O}_5\text{-rGO}$  composite aerogels prepared by Method II.

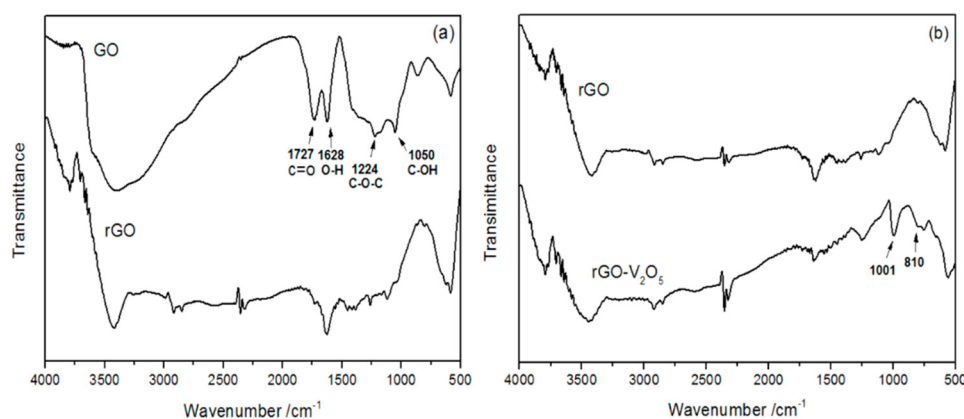

**Figure S3.** FTIR spectra of (a) GO and rGO; and (b)  $\text{rGO-V}_2\text{O}_5$  hybrid aerogel.

The absorption peaks at  $1050\text{ cm}^{-1}$  (C-OH),  $1224\text{ cm}^{-1}$  (C-O-C), and  $1727\text{ cm}^{-1}$  (C=O) suggest that graphite was chemically oxidized into GO [1]. The strong peak at  $1628\text{ cm}^{-1}$  belongs to moisture absorbed by GO. The evidence of reduction of GO into graphene by L-ascorbic acid are gleaned easily from the FTIR spectra. For example, the intensity of the characteristic peaks of C-OH and C-O-C are greatly reduced and the C=O peak at  $1727\text{ cm}^{-1}$  even disappeared. In view of this, it can be inferred that reduction of GO was complete. The FTIR spectra of rGO-V<sub>2</sub>O<sub>5</sub>-0.82 hybrid aerogel are compared with that of graphene aerogel as in Figure S3b. The FTIR spectrum of rGO-V<sub>2</sub>O<sub>5</sub>-0.82 hybrid aerogel exhibits two clear peaks at  $810\text{ cm}^{-1}$  and  $1001\text{ cm}^{-1}$  corresponding to doubly coordinated oxygen (bridge oxygen) bonds and stretching vibration of terminal oxygen bonds (V=O), respectively [2]. The results further confirm the presence of V<sub>2</sub>O<sub>5</sub> in the hybrid aerogel.

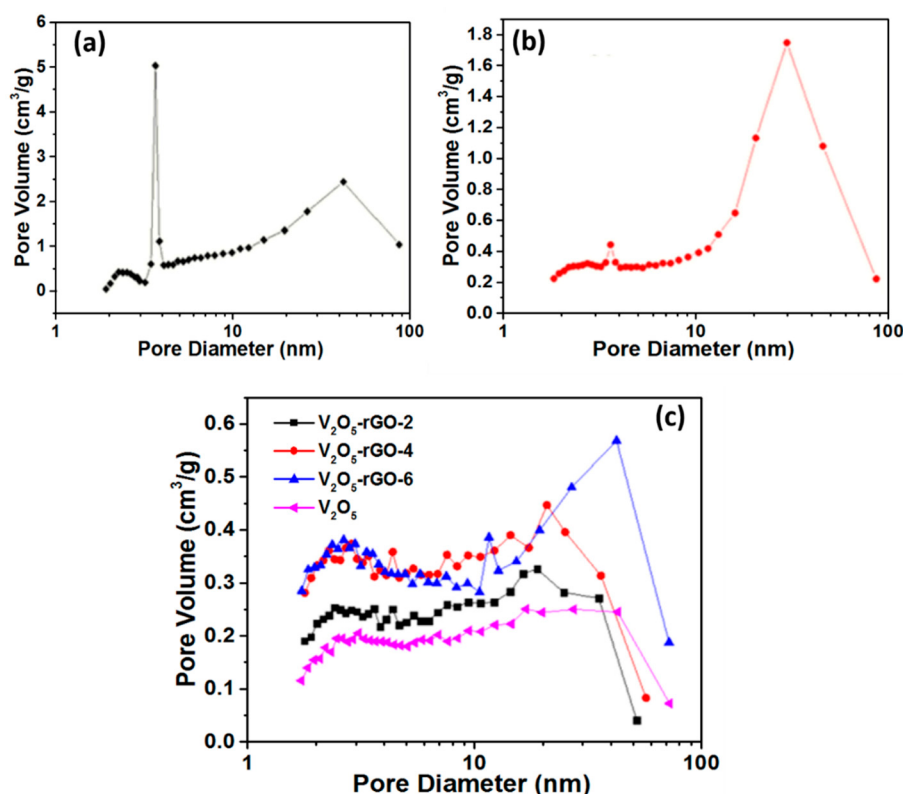

**Figure S4.** (a,b) BJH pore distribution of rGO aerogel and rGO-V<sub>2</sub>O<sub>5</sub>-0.82 composite aerogel prepared by Method I; and (c) BJH pore distribution of V<sub>2</sub>O<sub>5</sub>-rGO composite aerogels and thermally-treated V<sub>2</sub>O<sub>5</sub> aerogel prepared by Method II.

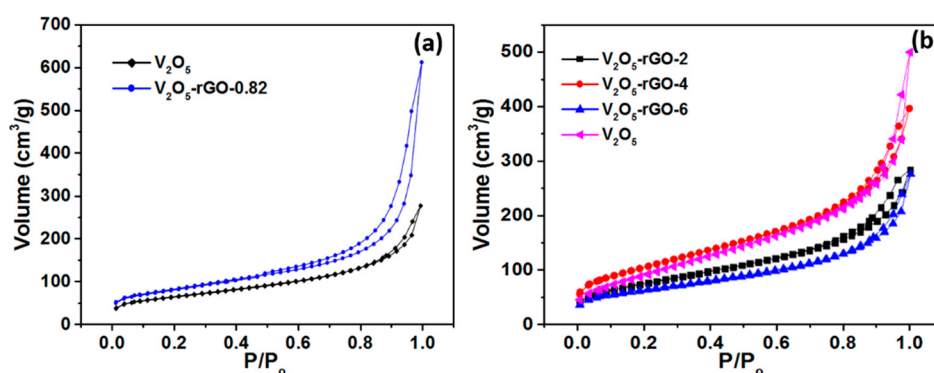

**Figure S5.** (a) Nitrogen adsorption-desorption isotherms of V<sub>2</sub>O<sub>5</sub> aerogel and rGO-V<sub>2</sub>O<sub>5</sub> hybrid aerogel prepared by Method I; and (b) nitrogen adsorption-desorption isotherms of heat-treated V<sub>2</sub>O<sub>5</sub> aerogel and V<sub>2</sub>O<sub>5</sub>-rGO hybrid aerogels with varying weight compositions prepared by Method II.

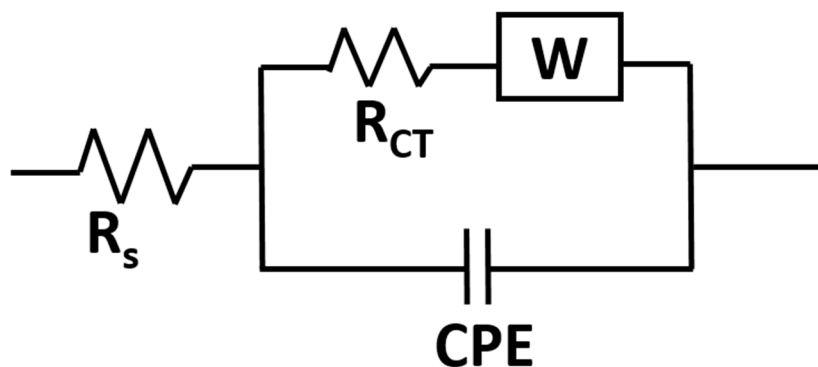

**Figure S6.** Equivalent circuit of the EIS of measured aerogel samples.

## References

1. Jeong, H.K.; Jin, M.H.; An, K.H.; Lee, Y.H. Structural stability and variable dielectric constant in poly sodium 4-styrenesulfonate intercalated graphite oxide. *J. Phys. Chem. C* **2009**, *113*, 13060–13064.
2. Zhou, X.W.; Wu, G.M.; Wu, J.D.; Yang, H.Y.; Wang, J.C.; Gao, G.H.; Cai, R.; Yan, Q.Y. Multiwalled carbon nanotubes– $V_2O_5$  integrated composite with nanosized architecture as a cathode material for high performance lithium ion batteries. *J. Mater. Chem. A* **2013**, *1*, 15459–15468.
